# Supplementary material
Source: PubMed Central journal article supplement (PMC4226359)
Supplement: supp_pp.114.248203_248203revSupplemental_Pereira_online.pdf [file supp_pp.114.248203_248203revSupplemental_Pereira_online.pdf]

1 **SUPPLEMENTAL DATA**

2  
3

4 **Title: Rice GROWTH UNDER DROUGHT KINASE Is Required for Drought Tolerance**  
5 **and Grain Yield under Normal and Drought Stress Conditions**

6  
7 Venkategowda Ramegowda<sup>1,#</sup>, Supratim Basu<sup>1,#</sup>, Arjun Krishnan<sup>2</sup>, Andy Pereira<sup>1,2,\*</sup>

8 <sup>1</sup>Crop, Soil, and Environmental Sciences, University of Arkansas, Fayetteville, Arkansas 72701;

9 <sup>2</sup>Virginia Bioinformatics Institute, Virginia Tech, Blacksburg, VA 24061.

10 <sup>#</sup>These authors contributed equally to this work.

11

12 **\*Corresponding author:**

13

14 Andy Pereira

15 Email: [apereira@uark.edu](mailto:apereira@uark.edu)

16

17

18 **Supplemental Figure S1.** Number of spikelets in wild-type and mutant  
19 plants under well-watered and drought stress conditions.

20

21

22 **Supplemental Figure S2.** Kinase assays to identify substrate specificity and co-factor  
23 requirement of GUDK.

24

25

26 **Supplemental Figure S3.** *In vitro* autophosphorylation assays for GUDK.

27

28

29 **Supplemental Figure S4.** Schematic representation of the workflow for identification of GUDK  
30 targets.

31

32 **Supplemental Table S1:** Primers used in the study

33

33  
34  
35

**Supplemental Fig. S1**

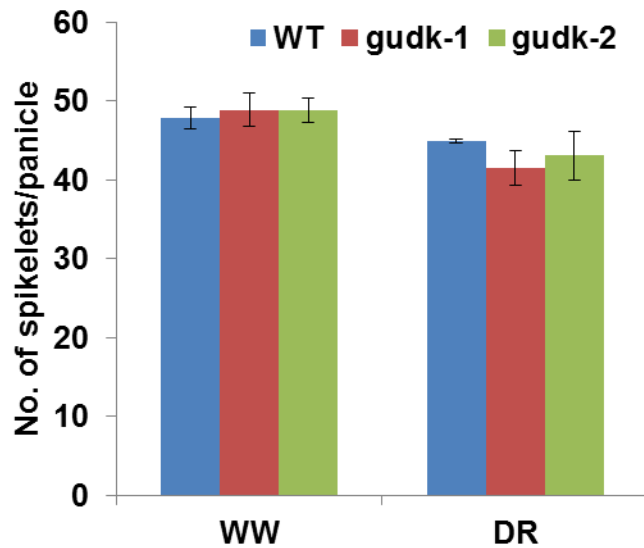

36  
37  
38  
39  
40  
41  
42  
43  
44  
45

**Supplemental Figure S1.** Number of spikelets in WT and mutant plants under well-watered and drought stress conditions. Drought stress (DR) was applied to both wild-type (WT) and *gudk* (*gudk-1* and *gudk-2*, two independent T-DNA insertion lines of *GROWTH UNDER DROUGHT KINASE* gene) mutant plants at R3 stage by withholding irrigation until all the leaves roll and wilt, followed by re-watering and maintaining the plants at well-watered (WW) condition until physiological maturity. A set of plants were maintained under flooded condition as well-watered plants. At physiological maturity panicles were harvested individually and number of spikelets/panicle were counted. Values are means  $\pm$  SE (n=6).

45  
46

### Supplemental Fig. S2

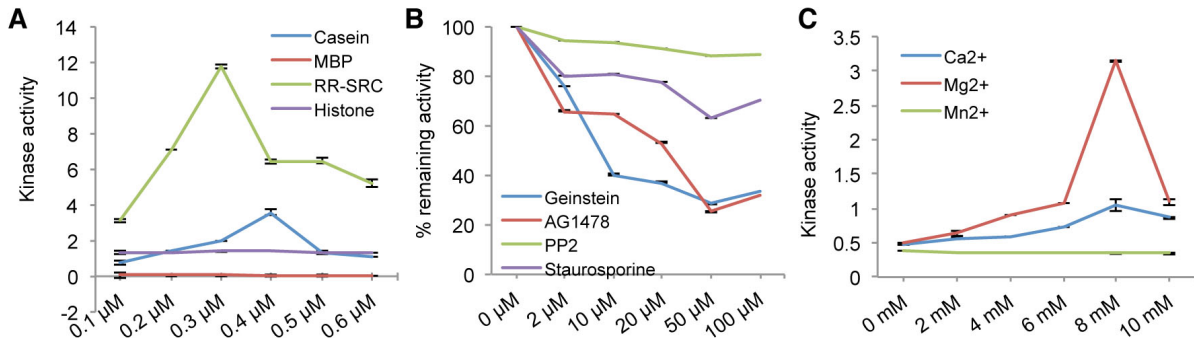

47  
48  
49  
50  
51  
52  
53  
54  
55  
56  
57  
58

**Supplemental Figure S2. Kinase assays to identify substrate specificity and co-factor requirement of GUDK.** (A) Substrate specificity of GUDK. Kinase assays were performed in with various concentrations of artificial substrates RR-SRC, histone III-S, MBP and casein. (B) Effect of different kinase inhibitors on the activity of GUDK. Influence of different inhibitors on the GUDK activity was studied by kinase assays in presence of various concentrations of artificial inhibitors. (C) Effect of various concentrations of  $\text{Ca}^{2+}$ ,  $\text{Mg}^{2+}$  and  $\text{Mn}^{2+}$  on the activity of GUDK. Kinase assays were performed using RR-SRC as substrate in presence of various concentrations of divalent cations. Each data points represent the mean  $\pm$  SE of three independent experiments. The kinase activity is expressed as the reciprocal of luminescence.

58 **Supplemental Fig. S3**

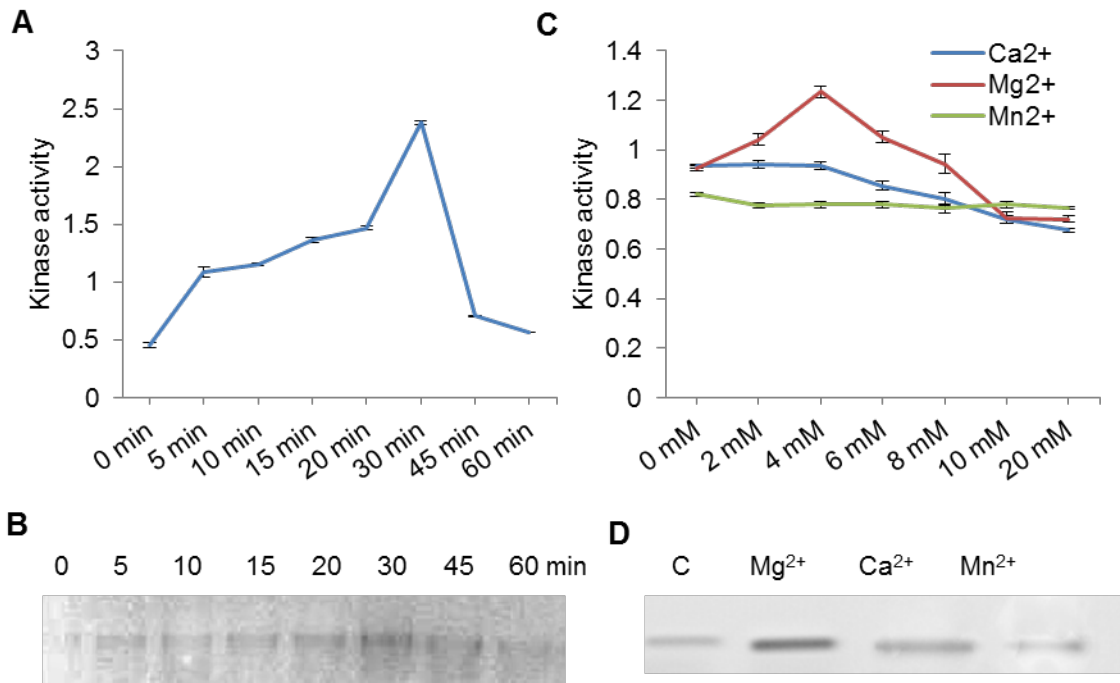

59  
60

61 **Supplemental Figure S3. *In vitro* autophosphorylation assays for GUDK.** (A) Kinetic  
62 analysis of GUDK autophosphorylation by kinase assay. The assay was carried out with GUDK  
63 alone and the luminescence was measured at different time points. Each data point represents the  
64 means  $\pm$  SE of three independent assays. Kinase activity is expressed as the reciprocal of  
65 luminescence. (B) Autophosphorylation of GUDK detected by immunoblot analysis using  
66 phosphotyrosine antibody. The samples were collected at different time points and 1  $\mu$ g of the  
67 protein was separated in 10% SDS-PAGE, subsequently transferred to the PVDF membrane and  
68 immunoblotted with phosphotyrosine antibody. (C) Kinase assays showing the effects of various  
69 concentrations of divalent cations on autophosphorylation of GUDK. Each data point represents  
70 the means  $\pm$  SE of three independent assays. Kinase activity is expressed as the reciprocal of  
71 luminescence. (D) Effect of different divalent cations on autophosphorylation of GUDK detected  
72 by immunoblot analysis using phosphotyrosine antibody. C – indicates control without any  
73 cations.

74  
75  
76  
77  
78

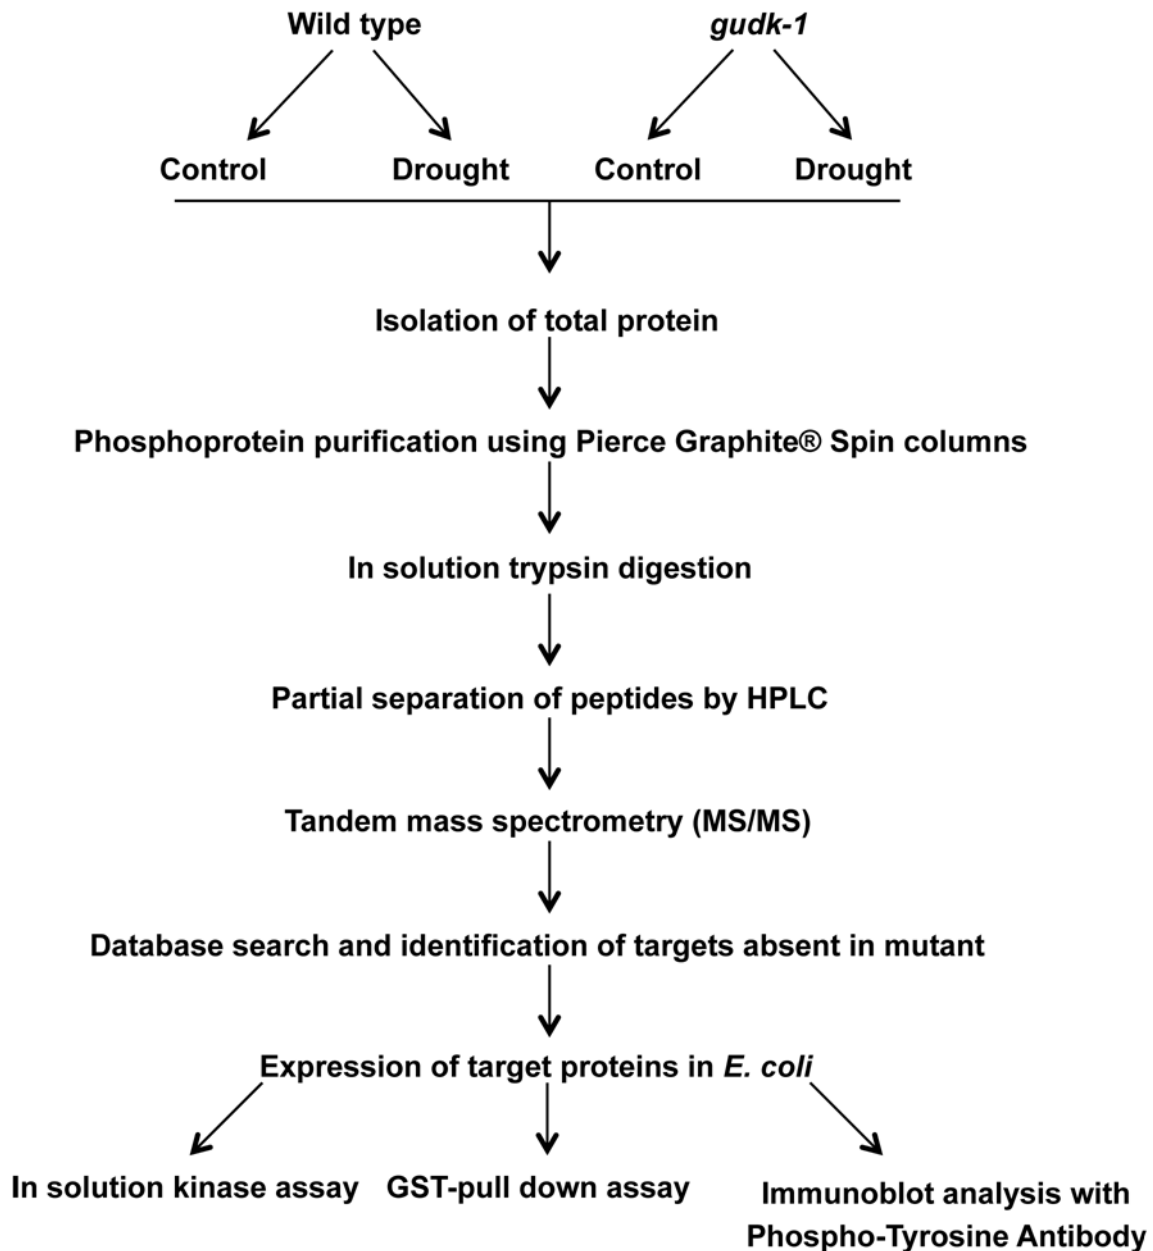

**Supplemental Figure S4. Schematic representation of the workflow for identification of GUDK targets.** The wild-type and *gudk-1* mutant genotypes from well-watered or drought treated plants were used for phosphoprotein extraction and comparative analysis using the flow-diagram as shown to identify differentially expressed proteins. Putative identified GUDK-1 target proteins were used in subsequent validation assays of specific kinase activity.

90

91 **Supplemental Table S1: Primers used in the study**

|                                                                                  |                                    |
|----------------------------------------------------------------------------------|------------------------------------|
| <b>A. Primers used to identify <i>gudk</i> homozygous mutant lines</b>           |                                    |
| T-DNA primer                                                                     | GTCTGGACCGATGGCTGTGTAGAAG          |
| Os03g08170 F                                                                     | AAAGTTTATGCCAGCGAGTTG              |
| Os03g08170 R                                                                     | TGACGGCATGAGATTATTGC               |
| <b>B. Primers used for <i>GUDK</i> expression analysis</b>                       |                                    |
| Os03g08170 F                                                                     | ATCAAGCGATGCCGGTAAA                |
| Os03g08170 R                                                                     | GTACGTCTGACATGCTCGTATT             |
| <b>C. Primers used for bacterial expression</b>                                  |                                    |
| Os01g58420 F                                                                     | ACGTGGATCCATGGCGCCAGAGCAGCT        |
| Os01g58420 R                                                                     | ACGTGAATCCTAGTTCTCTACCGGCGG        |
| Os03g08170 F                                                                     | ACGTGGATCCATGGGGAAGTCTCGGCTCC      |
| Os03g08170 R                                                                     | ACGTGAATTCTCTACTCGAGGAGAAGGGTA     |
| <b>D. Primers used for expression analysis of OsAP37 target genes</b>            |                                    |
| Os07g34520 F                                                                     | GCGCCAACCTTCTACGACAGG              |
| Os07g34520 R                                                                     | CTTGGCTGAAGTCCAGAGTG               |
| Os04g17660 F                                                                     | TACTTGGACGTCAGGACAGA               |
| Os04g17660 R                                                                     | TGCTATGAGATCGGCAGATG               |
| Os10g30850 F                                                                     | CAGCATCAGGCAATTCTACG               |
| Os10g30850 R                                                                     | TCCAATCCTCGAAGCATCTC               |
| Os08g32930 F                                                                     | GGATCTTGGAGGTCCGATCT               |
| Os08g32930 R                                                                     | AGCTGTGTATCCGTGGAAGG               |
| Os05g45450 F                                                                     | ATTCCAAGAGGCTGACATCC               |
| Os05g45450 R                                                                     | TCGTTGGTCTGGTCAACAT                |
| <b>E. Primers used for cloning promoters of OsAP37 for transactivation assay</b> |                                    |
| Os07g34520 F                                                                     | ACGTTCTAGACCATCCGTCGCAGCCCATT      |
| Os07g34520 R                                                                     | ACGTGGATCCTGCTTCGCCTGCAGAAAACGC    |
| Os04g17660 F                                                                     | ACGTTCTAGATAGCACGGGTTTATAATC       |
| Os04g17660 R                                                                     | ACGTGGATCCATAAATATGATAGGAATGCAT    |
| Os10g30850 F                                                                     | ACGTAAGCTTCACTCCACTCCTCTCTCC       |
| Os10g30850 R                                                                     | ACGTGGATCCATCTAAAATTAGATAGAACATACA |
| Os08g32930 F                                                                     | ACGTTCTAGACACAATTAATTTGGACCTCAC    |
| Os08g32930 R                                                                     | ACGTGGATCCGAGATTGGTTGATATTTTCCG    |
| Os05g45450 F                                                                     | ACGTTCTAGACGTCGCCCCAGAATTCTC       |
| Os05g45450 R                                                                     | ACGTGGATCCTATTAGCGAGGATGAACAAGT    |

92

93
